# Supplementary material for: Chemotactic Chemokines Are Important in the Pathogenesis of Irritable Bowel Syndrome
Source: PubMed Central journal article supplement (PMC3965506; doi:10.1371/journal.pone.0093144), 2014-03-25
Supplement: pone.0093144.s001.pdf [file pone.0093144.s001.pdf]

### Supplemental Materials

**S1.** A list of biomarkers that were evaluated and their reported roles in inflammation and immune response.

| MARKER                                                      | ROLE IN INFLAMMATION                                                                                                                                                                                     |
|-------------------------------------------------------------|----------------------------------------------------------------------------------------------------------------------------------------------------------------------------------------------------------|
| <b>C5a</b>                                                  | Chemoattractant, activates phagocytes, anaphylotoxin, aggregates neutrophils and platelets [1]                                                                                                           |
| <b>CD40L</b>                                                | Mediates B cell proliferation and Ig class switching                                                                                                                                                     |
| <b>G-CSF</b>                                                | Stimulates neutrophil development and granulocyte release [2,3]                                                                                                                                          |
| <b>GM-CSF</b>                                               | Stimulates polymorphonuclear cells, differentiation of hematopoietic cells [2,3]                                                                                                                         |
| <b>GRO<math>\alpha</math></b>                               | Neutrophilic chemoattraction and infiltration [3,4]                                                                                                                                                      |
| <b>I-309</b>                                                | Chemotaxis of monocytes, intracellular Ca <sup>2+</sup> mobilization [4,5]                                                                                                                               |
| <b>sICAM-1</b>                                              | Adhesion and transmigration of leukocytes [6]                                                                                                                                                            |
| <b>IFN-<math>\gamma</math></b>                              | Enhances MHC class I and class II expression, macrophage activation [2,3,7]                                                                                                                              |
| <b>IL-1<math>\alpha</math> &amp; IL-1<math>\beta</math></b> | Induces CD4 T cell differentiation, proliferation of mature B cells, PGE <sub>2</sub> synthesis, mast cell histamine release, induces IL-2 expression [2,3]                                              |
| <b>IL-1ra</b>                                               | Inhibits IL-1 by competitive binding to IL-1 receptor [2,3,7]                                                                                                                                            |
| <b>IL-2</b>                                                 | Activates T cells, NK cells, and B cells, class II MHC expression [2,3,7]                                                                                                                                |
| <b>IL-4</b>                                                 | Stimulates B/T-cell proliferation, suppresses development of Th1 cells, promotes Ig class switching, antagonizes IFN- $\gamma$ expression, anti-inflammatory, suppresses macrophage cytotoxicity [2,3,7] |
| <b>IL-5</b>                                                 | Eosinophil differentiation and activation, Ig class switching, B cell proliferation, anti-inflammatory [2,3,7]                                                                                           |
| <b>IL-6</b>                                                 | Stimulates acute phase protein synthesis, inhibits pro-inflammatory cytokines, promotes activation and differentiation of plasma cells and T-cells [2,8]                                                 |
| <b>IL-8</b>                                                 | Chemoattracts leukocytes to inflammation sites, upregulates adhesion molecules expression and adherence of leukocytes to endothelial cells [3,4]                                                         |
| <b>IL-10</b>                                                | Inhibits IFN- $\gamma$ production by NK cells and activated T-cells, dampens Th1 response, inhibits synthesis of IL-1 $\beta$ and NF $\kappa$ B nuclear translocation [3,7]                              |
| <b>IL-12p70</b>                                             | Enhances cytotoxic T-cell and NK cell proliferation and cytotoxicity, increases IFN- $\gamma$ production in T cells and NK cells, inhibits IgE release from B cells [3,7]                                |

|                                 |                                                                                                                                                   |
|---------------------------------|---------------------------------------------------------------------------------------------------------------------------------------------------|
| <b>IL-13</b>                    | Inhibits inflammatory cytokine production, induces Ig class switching to IgG <sub>4</sub> and IgE, attenuates macrophage activation [3,7]         |
| <b>IL-16</b>                    | Chemotaxis of CD4 T lymphocytes [2,9]                                                                                                             |
| <b>IL-17</b>                    | Stimulates IL-6, IL-8, and ICAM expression [2,10]                                                                                                 |
| <b>IL-17E</b>                   | Induces pro-inflammatory cytokine response, increase serum IgE and IgG <sub>1</sub> production, NFKB activation [11]                              |
| <b>IL-23</b>                    | Activation of CD4 memory T-cells, induces IL-17 and IL-6, pro-inflammatory [12]                                                                   |
| <b>IL-27</b>                    | Stimulates proliferation of naïve CD4 T-cells, Ig class switching, induces T-bet and IL-12R expression in naïve T cells [13]                      |
| <b>IL-32<math>\alpha</math></b> | Activation of P38 MAPK and NFKB pathways, induces secretion of pro-inflammatory cytokines such as TNF- $\alpha$ and MIP-2 [14]                    |
| <b>IP-10</b>                    | T-cells, NK cells, and monocytes chemoattractant, promotes T-cell adherence to endothelial cells [2,4]                                            |
| <b>I-TAC</b>                    | Th1 inflammation, recruits activated T-cells to site of inflammation [15]                                                                         |
| <b>MCP-1</b>                    | Chemotactic activation and migration of leukocytes to site of infection, stimulates histamine release [2,3,7]                                     |
| <b>MIF</b>                      | Activates production of macrophages, induces TNF- $\alpha$ production [16]                                                                        |
| <b>MIP-1<math>\alpha</math></b> | Chemotactic activation and migration of leukocytes to sites of inflammation, inhibits proliferation of early hematopoietic stem cells [2,3,7]     |
| <b>MIP-1<math>\beta</math></b>  | Chemotactic activation and migration of lymphocytes to sites of inflammation [2,3,7]                                                              |
| <b>PAI-1</b>                    | Extracellular matrix proteolysis, cellular adhesion and migration, inhibitory role in fibrinolytic system [17]                                    |
| <b>RANTES</b>                   | Chemotactic activation and migration of leukocytes to sites of inflammation, stimulates histamine release [2,3,7]                                 |
| <b>SDF-1</b>                    | Chemoattractant for lymphocytes, progenitor cell development in bone marrow [4]                                                                   |
| <b>TNF-<math>\alpha</math></b>  | Stimulation of PGE <sub>2</sub> , stimulates acute and chronic inflammation, induces apoptosis, induction of acute phase reactant proteins [2,18] |
| <b>sTREM-1</b>                  | Release of IL-8, MCP-1, TNF- $\alpha$ , induces neutrophil degranulation [19]                                                                     |

**S2.** Serum (A) and fecal (B) concentrations (in pg/ml) of key inflammatory markers detected in IBS patients and healthy volunteers.

### A. Serum concentrations

| INFLAMMATORY MARKER | HEALTHY CONTROL<br>N= 40 |        |           | IDIOPATHIC-IBS<br>N= 44 |        |           | POST-INFECTIOUS-IBS<br>N= 16 |        |            |
|---------------------|--------------------------|--------|-----------|-------------------------|--------|-----------|------------------------------|--------|------------|
|                     | MEAN                     | MEDIAN | RANGE     | MEAN                    | MEDIAN | RANGE     | MEAN                         | MEDIAN | RANGE      |
| MCP-1               | 295±17.5                 | 283.6  | 102-576.2 | 454±30.1                | 390.6  | 114-955.0 | 467±61.5                     | 421.3  | 212.3-1170 |
| MIP-1β              | 47±3.6                   | 45.2   | 1-111.1   | 220±22.8                | 213.3  | 28-579.5  | 216.2±38                     | 173.3  | 41-462.3   |
| IFN-γ               | 29±1.7                   | 32.4   | 0.1-47.5  | 49±5.6                  | 37.2   | 7-184.3   | 64±14.7                      | 40.6   | 30-238.9   |
| TNF-α               | 22.8±0.9                 | 24.5   | 0.2-30.4  | 34±3.9                  | 27.0   | 1-129.1   | 36±5.6                       | 27.0   | 23-86.1    |
| IL-1β               | 5.3±0.3                  | 5.4    | 0.02-10.3 | 9.8±1.5                 | 5.8    | 4-53.1    | 10.2±2.5                     | 6.0    | 4.7-36.6   |
| IL-10               | 11.3±0.8                 | 13.1   | 4.4-20.1  | 5.1±0.3                 | 5.3    | 0.1-10.1  | 6.5±0.6                      | 5.6    | 3.6-13.2   |
| CXCL16              | 873±0.07                 | 947    | 11-1544   | 2915±240                | 2966   | 543-4608  | 2908±126                     | 2830   | 1196-5213  |

### B. Fecal concentrations

| INFLAMMATORY MARKER | HEALTHY CONTROL<br>N= 20 |        |           | IDIOPATHIC-IBS<br>N= 20 |        |           | POST-INFECTIOUS-IBS<br>N= 10 |        |           |
|---------------------|--------------------------|--------|-----------|-------------------------|--------|-----------|------------------------------|--------|-----------|
|                     | MEAN                     | MEDIAN | RANGE     | MEAN                    | MEDIAN | RANGE     | MEAN                         | MEDIAN | RANGE     |
| MCP-1               | 149.6±18                 | 137.2  | 25-361.6  | 305±24                  | 289.2  | 113.9-464 | 235.9±26                     | 222.5  | 112-369   |
| MIP-1β              | 85.6±10                  | 74.0   | 20-149.8  | 170.4±11                | 178.0  | 88-312.8  | 145.9±10                     | 137.8  | 100-199.7 |
| IFN-γ               | 20.2±1.4                 | 22.0   | 40.3-31.7 | 41.7±7.3                | 28.9   | 24.5-156  | 35.9±5.7                     | 29.6   | 21-73.6   |
| TNF-α               | 14.8±1.9                 | 18.4   | 1.4-24.0  | 24±1.7                  | 20.5   | 18.2-48.0 | 26.5±5.7                     | 20.2   | 16.1-77.1 |
| IL-1β               | 5.3±0.4                  | 4.9    | 2.1-9.4   | 7.4±1.5                 | 4.5    | 3-28.9    | 7.7±1.6                      | 4.9    | 3.7-24.8  |
| IL-10               | 10.1±1.6                 | 7.6    | 4.5-37.9  | 4.6±0.6                 | 5.1    | 0.02-12.5 | 4.8±1.1                      | 5.1    | 0.02-15.7 |
| CXCL16              | 405±64.5                 | 327    | 48-952    | 2150±163                | 2066   | 1165-3978 | 1733±351                     | 1852   | 1200-5200 |

## References

1. Guo RF, Ward PA (2005) Role of C5a in inflammatory responses. *Annu Rev Immunol* 23: 821-852.
2. Feghali CA, Wright TM (1997) Cytokines in acute and chronic inflammation. *Front Biosci* 2: d12-26.
3. Liles WC, Van Voorhis WC (1995) Review: nomenclature and biologic significance of cytokines involved in inflammation and the host immune response. *J Infect Dis* 172: 1573-1580.
4. Luster AD (1998) Chemokines--chemotactic cytokines that mediate inflammation. *N Engl J Med* 338: 436-445.
5. Haque NS, Zhang X, French DL, Li J, Poon M, et al. (2000) CC chemokine I-309 is the principal monocyte chemoattractant induced by apolipoprotein(a) in human vascular endothelial cells. *Circulation* 102: 786-792.
6. Ridker PM, Hennekens CH, Roitman-Johnson B, Stampfer MJ, Allen J (1998) Plasma concentration of soluble intercellular adhesion molecule 1 and risks of future myocardial infarction in apparently healthy men. *Lancet* 351: 88-92.
7. Opal SM, DePalo VA (2000) Anti-inflammatory cytokines. *Chest* 117: 1162-1172.
8. Cameron MJaK, D. J. (2000) Cytokines, Chemokines and Their Receptors. *Madame Curie Bioscience Database*. Austin: Landes Bioscience.
9. Rumsaeng V, Cruikshank WW, Foster B, Prussin C, Kirshenbaum AS, et al. (1997) Human mast cells produce the CD4+ T lymphocyte chemoattractant factor, IL-16. *J Immunol* 159: 2904-2910.

10. Fossiez F, Banchereau J, Murray R, Van Kooten C, Garrone P, et al. (1998) Interleukin-17. *Int Rev Immunol* 16: 541-551.
11. Pan G, French D, Mao W, Maruoka M, Risser P, et al. (2001) Forced expression of murine IL-17E induces growth retardation, jaundice, a Th2-biased response, and multiorgan inflammation in mice. *J Immunol* 167: 6559-6567.
12. Yen D, Cheung J, Scheerens H, Poulet F, McClanahan T, et al. (2006) IL-23 is essential for T cell-mediated colitis and promotes inflammation via IL-17 and IL-6. *J Clin Invest* 116: 1310-1316.
13. Liu L, Wang S, Shan B, Shao L, Sato A, et al. (2008) IL-27-mediated activation of natural killer cells and inflammation produced antitumour effects for human oesophageal carcinoma cells. *Scand J Immunol* 68: 22-29.
14. Moschen AR, Fritz T, Clouston AD, Rebhan I, Bauhofer O, et al. (2011) Interleukin-32: a new proinflammatory cytokine involved in hepatitis C virus-related liver inflammation and fibrosis. *Hepatology* 53: 1819-1829.
15. Helbig KJ, Ruzskiewicz A, Semendric L, Harley HA, McColl SR, et al. (2004) Expression of the CXCR3 ligand I-TAC by hepatocytes in chronic hepatitis C and its correlation with hepatic inflammation. *Hepatology* 39: 1220-1229.
16. Calandra T, Bernhagen J, Mitchell RA, Bucala R (1994) The macrophage is an important and previously unrecognized source of macrophage migration inhibitory factor. *J Exp Med* 179: 1895-1902.
17. Renckens R, Roelofs JJ, de Waard V, Florquin S, Lijnen HR, et al. (2005) The role of plasminogen activator inhibitor type 1 in the inflammatory response to local tissue injury. *J Thromb Haemost* 3: 1018-1025.

18. Idriss HT, Naismith JH (2000) TNF alpha and the TNF receptor superfamily: structure-function relationship(s). *Microsc Res Tech* 50: 184-195.
19. Radsak MP, Salih HR, Rammensee HG, Schild H (2004) Triggering receptor expressed on myeloid cells-1 in neutrophil inflammatory responses: differential regulation of activation and survival. *J Immunol* 172: 4956-4963.
